# Supplementary material for: Dissociable age and memory relationships with hippocampal subfield volumes in vivo:Data from the Irish Longitudinal Study on Ageing (TILDA)
Source: PubMed Central journal article supplement (PMC6662668; doi:10.1038/s41598-019-46481-5), 2019-07-29
Supplement: 41598_2019_46481_MOESM1_ESM.pdf [file 41598_2019_46481_MOESM1_ESM.pdf]

Dissociable age and memory relationships with hippocampal subfield volumes

in vivo:

Data from the Irish Longitudinal Study on Ageing (TILDA)

Daniel Carey <sup>1,2 \*</sup>

Hugh Nolan <sup>1,2</sup>

Rose Anne Kenny <sup>1,2</sup>

James Meaney <sup>3,4</sup>

### **Supplementary Materials**

1. The Irish Longitudinal Study on Ageing (TILDA), Trinity College Dublin, Dublin 2, Ireland
2. Dept. of Medical Gerontology, Trinity College Dublin, Dublin 2, Ireland
3. Dept. of Clinical Radiology, Trinity College Dublin, Dublin 2, Ireland
4. Centre for Advanced Medical Imaging (CAMI), St. James' Hospital, Dublin 8, Ireland

## **Supplementary Methods**

### **1. Verbal Episodic Memory and Semantic Fluency Assessment**

The CAPI immediate recall (IR) and delayed recall (DR) tasks were each adopted from the Health and Retirement Study (HRS), a large prospective cohort study of retired older adults resident in the United States (note that the HRS cohort was merged with the cohort of the Asset Health Dynamics Among the Oldest Old (AHEAD) study in 1998) [1,2]. The animal naming task was adapted from the English Longitudinal Study on Ageing (ELSA), a prospective cohort study of older adults resident in the United Kingdom [3]. TILDA is harmonised with both HRS and ELSA, and thus many measures used in those studies have been adopted in largely identical form by TILDA [4].

**IR and DR tasks.** Briefly, the IR and DR tasks comprise four 10-item word lists, consisting of common nouns ranging in length from one to two syllables. The word lists employed in the HRS IR and DR tasks have subsequently been adopted in unedited form by several international prospective cohort studies of ageing, including the English Longitudinal Study on Ageing (ELSA) and the Irish Longitudinal Study on Ageing (TILDA). Validation of the IR and DR wordlist items was reported by [1], including the factor structure of the IR and DR tasks and normative data for task performance, across multiple years of study data from HRS and the AHEAD study (which included the same IR and DR tasks and wordlists as HRS). With respect to factor structure, IR and DR tasks from AHEAD years 1993 and 1995, and HRS year 1996, were found to load highly on a single factor (factor score ranges, AHEAD 1993 & 1995: IR,

0.94-0.95; DR, 0.76-0.79; factor scores, HRS 1996: IR, 0.94; DR, 0.76; see [1], their Table 12). Further, in exploring relationships across HRS cognitive tasks (data from Waves 8-10 of HRS/AHEAD, 2006-2010), [2] reported the correlation between IR and DR as 0.76,  $p < 0.01$  (their Table 3). Indeed, this agrees closely with the correlation observed in the present TILDA Wave 3 MRI cohort between the IR and DR tasks ( $\rho = 0.7$ ,  $p < 0.0001$ ).

Normative IR and DR data (all scale ranges: 0-10) presented by [1] for HRS years 1992 and 1994 revealed the following means ( $\pm$ SDs) for total scores (their Table 7): 1992 – IR, 7.61 (2.65) [N=9090]; DR, 5.54 (2.83) [N=9020]. 1994 – IR, 8.09 (3.07) [N=7968]; DR, 6.22 (3.25) [N=7832]. Similarly, normative data presented by [3] for IR and DR in Wave 4 of ELSA (2008-2009) showed means ( $\pm$ SDs) as follows (their Table 1): IR, 5.7 (1.7); DR, 4.3 (2.0); [both N=5197]. The means and standard deviations reported above are in accordance with the medians and interquartile ranges found for the TILDA MRI sample in the current report (see Table 1; median IR (IQR): 7 (6.5, 8.5); median DR (IQR): 7 (5, 8) [N=436]).

As demonstrated above, across different years from the HRS/AHEAD prospective cohort studies of older adults, the IR and DR tasks revealed consistent factor structures, indicative of strong construct validity and good reliability. In utilising the same task wordlists and closely aligned procedure, correlations between the IR and DR tasks were found to be of similar magnitude in TILDA as in ELSA. Moreover, normative data for performance on IR and DR suggested similar means/medians and ranges of performance

across the three studies, notably with TILDA median IR scores falling between the means of ELSA and HRS.

**Animal naming task.** The animal naming task entails self-generation of common semantic categories by participants, and is routinely used in the evaluation of clinical populations, including patients with Alzheimer's-type dementia [5], and in patients with neuropsychological conditions [6]. Adopting the procedure of ELSA, participants in TILDA were asked to name as many animals as possible within 60 seconds (discounting proper nouns and repetitions).

In a systematic review of the extant literature on verbal semantic fluency evaluation in large cohort studies, [6] reported the mean ( $\pm$ SD) scores from animal naming tasks conducted in 12 studies carried out between the years 1999 and 2015. The mean of mean scores from the 12 studies was reported as 19.83 (5.76) animals named correctly [6] (their Table 1) (we note that the 12 studies included one on the TILDA cohort; see [7]). Furthermore, examining verbal semantic fluency in the ELSA cohort (Wave 4, 2008-2009), [3] found mean ( $\pm$ SD) of animal naming scores was 20.3 (6.5) [N=5197], comparable to means ( $\pm$ SDs) reported previously by [8] for Wave 1 ( $20.8\pm 7.0$ ) and Wave 2 ( $19.2\pm 6.1$ ) of TILDA [N=3417]. Indeed, the current MRI sub-cohort of TILDA (randomly sampled from the main cohort) had a median animal naming score of 19 (IQR: 15.5,23), in line with the Wave 1 and Wave 2 observations for the sample of the main TILDA cohort analysed by [8], and the means reported by [3].

Hence, given the close consistency of central tendency measurements for animal naming from a sample of large cohort studies [6], ELSA [3], and previous TILDA Waves [8], the results from the present report concur closely with expected score distributions.

**Test-retest reliability: TILDA MRI cohort.** Finally, appraising the test-retest reliability of the IR, DR and AN tasks within the TILDA MRI cohort, we ran Spearman correlations across these tasks for participants within the MRI cohort who had provided data for all three tasks at Waves 1-3 of TILDA. In order to maximise the test-retest N(=513), we included participants in the correlations who were excluded from the mixed effects analyses in the present report based on MRI QC criteria (e.g., lesions, motion artifacts, poor reconstructions). Since the IR task in each wave allowed participants two attempts at recalling the word list, we entered each attempt of the IR task per wave into the correlational analyses, in order to appraise consistency of measurement within the same session (attempts referred to as IR1 and IR2).

Supplementary table 4 presents the test-retest correlations for the IR, DR and AN tasks, across Waves 1 to 3. As can be seen for the IR task, the completion attempts within the same session (i.e., IR1 & IR2) were highly correlated; this was true across each of the three waves (all  $\rho > 0.6$ ). Similarly, within each wave, the DR task showed moderate to high correlations with both IR1 and IR2 ( $\rho$  range: 0.54-0.72). Considering between-wave correlations, IR1 and IR2 were moderately correlated across adjacent waves. For instance, correlations between IR1 and IR2 in Waves 1

and Wave 2 ranged from 0.38 to 0.47; similarly, correlations between IR1 and IR2 in Waves 2 and 3 ranged from 0.41 to 0.44. Inspecting DR correlations across waves revealed a similar pattern of moderate correlations between adjacent waves: Wave 1 DR vs. Wave 2 DR,  $\rho=0.53$ ; Wave 2 DR vs. Wave 3 DR,  $\rho=0.53$ . For IR1 and IR2, correlations across the non-adjacent waves (1 and 3) were reduced ( $\rho$  range: 0.35-0.39); however, DR correlations remained moderate when considering Wave 1 and Wave 3 ( $\rho=0.51$ ). The AN task was attempted by participants once in each wave; correlations across waves were within the moderate range, and as above, were highest when considering adjacent waves (AN Wave 1 vs. AN Wave 2,  $\rho=0.49$ ; AN Wave 2 vs. AN Wave 3,  $\rho=0.5$ ; AN Wave 1 vs. AN Wave 3,  $\rho=0.44$ ).

In sum, correlational analyses revealed strong test-retest reliability within-wave for assays of IR performance; DR showed similarly high consistency with within-wave IR scores. Across waves, test-retest reliability was strongest for IR performance when considering adjacent waves, but was reduced for non-adjacent waves (likely due to the greater inter-assessment interval); DR performance showed good reliability across adjacent and non-adjacent waves. AN performance across waves suggested good test-retest reliability, with a small increase in correlation between adjacent versus non-adjacent waves. Coupled with the correlations between tasks observed in independent cohorts referenced above (see [2]), our findings point towards largely strong reliability of measurements within the TILDA MRI cohort.

## **2. Covariate Selection**

As presented in Table 1, we measured depressive symptoms using the abbreviated form of the CES-D depression inventory. We found that the range of scores for depressive symptoms was truncated, with the 1st to 3rd quartiles (n=335) of the distribution reflecting scores less than 5. The 4th quartile (n=97) comprised scores of 5 or greater; however, in practice, we found that most of these participants had scores between 5 and 7, below the cutoff of 8 deemed clinically relevant for depression. Hence, the cohort overwhelmingly did not meet criteria for depression. Given the very restricted range of values for CES-D scores and the largely non-depressed nature of the cohort, we did not adjust for CES-D depression scores in statistical models.

## References

1. Ofstedal, M.B., Fisher, G.G., Herzog, A.R. Documentation of cognitive functioning measures of the Health and Retirement Study. *HRS Documentation Report*. **DR006**, 1-55 (2005).  
<http://hrsonline.isr.umich.edu/sitedocs/userg/dr-006.pdf>
2. Blankson, A.N., McArdle, J.J. A brief report on the factor structure of the cognitive measures in the HRS/AHEAD studies. *J. Aging. Res.* **2014**, 1-5 (2014). doi: 10.1155/2014/798514.
3. Smith, T. O., Neal, S. R., Peryer, G., Sheehan, K. J., Tan, M. P., Myint, P. K. Orientation and verbal fluency in the English Longitudinal Study of Ageing: modifiable risk factors for falls? *Int. Psychogeriatr.* 1-8 (2018). doi: 10.1017/S1041610218002065.
4. Shih, R.A., Lee, J. & Das, L. Harmonization of cross-national studies of ageing to the Health and Retirement Study. *RAND Lab Pop.* **WR-861/7**, 1-101 (2011).
5. Ober, B. A., Dronkers, N. F., Koss, E., Delis, D. C., Friedland, R. P. Retrieval from semantic memory in Alzheimer-type dementia. *J. Clin. Exp. Neuropsych.* **8(1)**, 75-92 (1986).
6. Woods, D. L., Wyma, J. M., Herron, T. J., Yund, E. W. Computerized analysis of verbal fluency: Normative data and the effects of repeated testing, simulated malingering, and traumatic brain injury. *PloS one.* **11(12)**, e0166439 (2016).



7. Feeney, J., Finucane, C., Savva, G. M., Cronin, H., Beatty, S., Nolan, J. M., & Kenny, R. A. Low macular pigment optical density is associated with lower cognitive performance in a large, population-based sample of older adults. *Neurobiol aging*. **34(11)**, 2449-2456 (2013).
8. Feeney, J., O'Leary, N., & Kenny, R. A. Impaired orthostatic blood pressure recovery and cognitive performance at two-year follow up in older adults: The Irish Longitudinal Study on Ageing. *Clin. Auton. Res.* **26(2)**, 127-133 (2016).
9. Rosetti, H.C., Lacritz, L.H., Cullum, C.M., Weiner, M.F. Normative data for the Montreal Cognitive Assessment (MoCA) in a population-based sample. *Neurology*. **13**, 1272-1275 (2011).

**Supplementary table 1: Immediate recall (IR) fully adjusted model output**

| Term                        | Estimate   | Std. Err. | z     | p     | 95% CI Lower | 95% CI Upper |
|-----------------------------|------------|-----------|-------|-------|--------------|--------------|
| Subregion (ref: Parasubic.) |            |           |       |       |              |              |
| Presubic.                   | 142.1935   | 142.7524  | 1.0   | 0.319 | -137.5961    | 421.9831     |
| Subiculum                   | 6.097465   | 141.1687  | 0.04  | 0.966 | -270.588     | 282.783      |
| CA1                         | 37.05575   | 196.9797  | 0.19  | 0.851 | -349.0173    | 423.1288     |
| CA3                         | -123.2123  | 96.93764  | -1.27 | 0.204 | -313.2066    | 66.78199     |
| CA4                         | 0.7526116  | 82.79014  | 0.01  | 0.993 | -161.5131    | 163.0183     |
| Mol. layer                  | 116.8182   | 139.6909  | 0.84  | 0.403 | -156.9708    | 390.6073     |
| HATA                        | -12.44896  | 110.136   | -0.11 | 0.91  | -228.3116    | 203.4137     |
| Fimbria                     | -41.95398  | 130.0188  | -0.32 | 0.747 | -296.7861    | 212.8782     |
| GC-DG                       | 23.08426   | 85.76469  | 0.27  | 0.788 | -145.0115    | 191.18       |
| Hipp. tail                  | 70.64821   | 201.3977  | 0.35  | 0.726 | -324.0841    | 465.3805     |
| IR                          | -9.51344   | 40.32164  | -0.24 | 0.813 | -88.54239    | 69.51551     |
| IR <sup>2</sup>             | 1.246418   | 5.890191  | 0.21  | 0.832 | -10.29815    | 12.79098     |
| IR <sup>3</sup>             | -0.0457722 | 0.2797392 | -0.16 | 0.87  | -0.5940511   | 0.5025066    |
| Subregion x IR              |            |           |       |       |              |              |
| Presubic.                   | -1.604872  | 48.20532  | -0.03 | 0.973 | -96.08557    | 92.87583     |
| Subiculum                   | 37.73244   | 47.67051  | 0.79  | 0.429 | -55.70005    | 131.1649     |
| CA1                         | 169.8731   | 66.51704  | 2.55  | 0.011 | 39.50213     | 300.2441     |
| CA3                         | 111.8887   | 32.73437  | 3.42  | 0.001 | 47.73048     | 176.0469     |
| CA4                         | 69.63506   | 27.95697  | 2.49  | 0.013 | 14.8404      | 124.4297     |
| Mol. layer                  | 117.4734   | 47.17148  | 2.49  | 0.013 | 25.01901     | 209.9278     |
| HATA                        | 5.522907   | 37.19127  | 0.15  | 0.882 | -67.37064    | 78.41645     |
| Fimbria                     | -13.01674  | 43.90537  | -0.3  | 0.767 | -99.06969    | 73.03621     |
| GC-DG                       | 74.95629   | 28.96143  | 2.59  | 0.01  | 18.19292     | 131.7197     |
| Hipp. tail                  | 33.73013   | 68.00896  | 0.5   | 0.62  | -99.56498    | 167.0252     |
| Subregion x IR <sup>2</sup> |            |           |       |       |              |              |
| Presubic.                   | 0.2985861  | 7.03892   | 0.04  | 0.966 | -13.49744    | 14.09462     |
| Subiculum                   | -6.041867  | 6.960828  | -0.87 | 0.385 | -19.68484    | 7.601104     |
| CA1                         | -26.41109  | 9.712789  | -2.72 | 0.007 | -45.4478     | -7.374369    |
| CA3                         | -16.35376  | 4.779858  | -3.42 | 0.001 | -25.72211    | -6.985406    |

| Term                        | Estimate   | Std. Err. | z     | p      | 95% CI Lower | 95% CI Upper |
|-----------------------------|------------|-----------|-------|--------|--------------|--------------|
| CA4                         | -10.46946  | 4.082265  | -2.56 | 0.01   | -18.47055    | -2.468366    |
| Mol. layer                  | -18.10557  | 6.887959  | -2.63 | 0.009  | -31.60572    | -4.605423    |
| HATA                        | -0.399259  | 5.430653  | -0.07 | 0.941  | -11.04314    | 10.24462     |
| Fimbria                     | 1.705601   | 6.411043  | 0.27  | 0.79   | -10.85981    | 14.27102     |
| GC-DG                       | -11.38945  | 4.228936  | -2.69 | 0.007  | -19.67801    | -3.100891    |
| Hipp. tail                  | -3.912929  | 9.930638  | -0.39 | 0.694  | -23.37662    | 15.55076     |
| Subregion x IR <sup>3</sup> |            |           |       |        |              |              |
| Presubic.                   | -0.0190465 | 0.3342258 | -0.06 | 0.955  | -0.674117    | 0.6360239    |
| Subiculum                   | 0.2906227  | 0.3305177 | 0.88  | 0.379  | -0.3571801   | 0.9384255    |
| CA1                         | 1.27627    | 0.4611878 | 2.77  | 0.006  | 0.3723587    | 2.180182     |
| CA3                         | 0.7625773  | 0.2269598 | 3.36  | 0.001  | 0.3177444    | 1.20741      |
| CA4                         | 0.4989833  | 0.1938363 | 2.57  | 0.01   | 0.1190712    | 0.8788954    |
| Mol. layer                  | 0.8700831  | 0.3270577 | 2.66  | 0.008  | 0.2290618    | 1.511104     |
| HATA                        | 0.001934   | 0.2578611 | 0.01  | 0.994  | -0.5034645   | 0.5073326    |
| Fimbria                     | -0.0694307 | 0.3044126 | -0.23 | 0.82   | -0.6660684   | 0.5272069    |
| GC-DG                       | 0.5448519  | 0.2008006 | 2.71  | 0.007  | 0.15129      | 0.9384138    |
| Hipp. tail                  | 0.1261307  | 0.4715318 | 0.27  | 0.789  | -0.7980548   | 1.050316     |
| Age                         | -0.703256  | 2.42525   | -0.29 | 0.772  | -5.45666     | 4.050148     |
| Age <sup>2</sup>            | 0.0104371  | 0.0176027 | 0.59  | 0.553  | -0.0240635   | 0.0449377    |
| Subregion x age             |            |           |       |        |              |              |
| Presubic.                   | 4.408865   | 2.890255  | 1.53  | 0.127  | -1.25593     | 10.07366     |
| Subiculum                   | 10.33173   | 2.858189  | 3.61  | 0.0001 | 4.729778     | 15.93367     |
| CA1                         | 8.357675   | 3.988173  | 2.1   | 0.036  | 0.5409989    | 16.17435     |
| CA3                         | 1.6128     | 1.96266   | 0.82  | 0.411  | -2.233943    | 5.459543     |
| CA4                         | 2.261464   | 1.676221  | 1.35  | 0.177  | -1.023869    | 5.546796     |
| Mol. layer                  | 7.191145   | 2.828268  | 2.54  | 0.011  | 1.647841     | 12.73445     |
| HATA                        | 0.1402486  | 2.229883  | 0.06  | 0.95   | -4.230242    | 4.510739     |
| Fimbria                     | 3.64341    | 2.632442  | 1.38  | 0.166  | -1.516081    | 8.802901     |
| GC-DG                       | 3.07018    | 1.736445  | 1.77  | 0.077  | -0.3331909   | 6.47355      |
| Hipp. tail                  | 11.91552   | 4.077624  | 2.92  | 0.003  | 3.923521     | 19.90751     |

| Term                                    | Estimate   | Std. Err. | z     | p      | 95% CI Lower | 95% CI Upper |
|-----------------------------------------|------------|-----------|-------|--------|--------------|--------------|
| Subregion x age <sup>2</sup>            |            |           |       |        |              |              |
| Presubic.                               | -0.0451059 | 0.0209558 | -2.15 | 0.031  | -0.0861785   | -0.0040333   |
| Subiculum                               | -0.0913529 | 0.0207233 | -4.41 | 0.0001 | -0.1319699   | -0.050736    |
| CA1                                     | -0.0821439 | 0.0289163 | -2.84 | 0.005  | -0.1388187   | -0.025469    |
| CA3                                     | -0.01851   | 0.0142303 | -1.3  | 0.193  | -0.0464008   | 0.0093808    |
| CA4                                     | -0.0255582 | 0.0121534 | -2.1  | 0.035  | -0.0493785   | -0.0017378   |
| Mol. layer                              | -0.0767396 | 0.0205064 | -3.74 | 0.0001 | -0.1169314   | -0.0365479   |
| HATA                                    | -0.0035208 | 0.0161678 | -0.22 | 0.828  | -0.0352091   | 0.0281675    |
| Fimbria                                 | -0.0332859 | 0.0190865 | -1.74 | 0.081  | -0.0706948   | 0.004123     |
| GC-DG                                   | -0.0350417 | 0.0125901 | -2.78 | 0.005  | -0.0597178   | -0.0103655   |
| Hipp. tail                              | -0.1141039 | 0.0295648 | -3.86 | 0.0001 | -0.1720499   | -0.0561579   |
| Total grey matter vol.                  | 0.0003172  | 0.0000242 | 13.12 | 0.0001 | 0.0002698    | 0.0003646    |
| Sex (ref: male)                         | 1.20943    | 2.268755  | 0.53  | 0.594  | -3.237249    | 5.656108     |
| Education (ref: primary/none)           |            |           |       |        |              |              |
| Secondary                               | -3.404605  | 2.434367  | -1.4  | 0.162  | -8.175876    | 1.366666     |
| Third/higher                            | -4.306848  | 2.500736  | -1.72 | 0.085  | -9.2082      | 0.5945038    |
| Current/past smoker (ref: never smoked) | 2.108114   | 1.798607  | 1.17  | 0.241  | -1.417091    | 5.633318     |
| Handedness (ref: right)                 | -2.509039  | 3.196911  | -0.78 | 0.433  | -8.77487     | 3.756791     |
| Cardiac disease (ref: none)             | -6.24081   | 2.507516  | -2.49 | 0.013  | -11.15545    | -1.326169    |
| Intercept                               | -102.0963  | 120.4873  | -0.85 | 0.397  | -338.247     | 134.0545     |
| Random effects parameters               |            |           |       |        |              |              |
| Participant var                         | 218.7309   | 24.13201  | N/A   | N/A    | 176.1973     | 271.532      |
| Hemisphere var                          | 233.7628   | 16.19177  | N/A   | N/A    | 204.0874     | 267.7531     |
| Residuals var                           |            |           |       |        |              |              |
| Presubic.                               | 1232.518   | 59.50633  | N/A   | N/A    | 1121.236     | 1354.845     |
| Subiculum                               | 1191.584   | 57.69828  | N/A   | N/A    | 1083.698     | 1310.211     |
| Parasubic.                              | 622.5802   | 29.92984  | N/A   | N/A    | 566.5976     | 684.0941     |
| CA1                                     | 2909.599   | 139.8057  | N/A   | N/A    | 2648.092     | 3196.931     |

| Term       | Estimate | Std. Err. | z   | p   | 95% CI Lower | 95% CI Upper |
|------------|----------|-----------|-----|-----|--------------|--------------|
| CA3        | 232.8506 | 11.28506  | N/A | N/A | 211.7503     | 256.0535     |
| CA4        | 1.380382 | 1.537078  | N/A | N/A | 0.1556583    | 12.24127     |
| Mol. layer | 1153.8   | 55.7241   | N/A | N/A | 1049.593     | 1268.353     |
| HATA       | 481.6481 | 23.22459  | N/A | N/A | 438.2135     | 529.3879     |
| Fimbria    | 916.3263 | 44.30098  | N/A | N/A | 833.4849     | 1007.402     |
| GC-DG      | 47.02224 | 2.406808  | N/A | N/A | 42.53388     | 51.98423     |
| Hipp. tail | 3069.823 | 147.0879  | N/A | N/A | 2794.659     | 3372.081     |

**Supplementary table 2: Delayed recall (DR) fully adjusted model output**

| Term                        | Estimate   | Std. Err. | z     | p      | 95% CI Lower | 95% CI Upper |
|-----------------------------|------------|-----------|-------|--------|--------------|--------------|
| Subregion (ref: Parasubic.) |            |           |       |        |              |              |
| Presubic.                   | 144.2423   | 98.89328  | 1.46  | 0.145  | -49.58499    | 338.0695     |
| Subiculum                   | 86.18166   | 97.90113  | 0.88  | 0.379  | -105.701     | 278.0643     |
| CA1                         | 399.7109   | 136.4101  | 2.93  | 0.003  | 132.3521     | 667.0698     |
| CA3                         | 111.9922   | 67.19756  | 1.67  | 0.096  | -19.71257    | 243.697      |
| CA4                         | 146.3315   | 57.40157  | 2.55  | 0.011  | 33.82647     | 258.8365     |
| Mol. layer                  | 368.6315   | 96.74156  | 3.81  | 0.0001 | 179.0216     | 558.2415     |
| HATA                        | -0.1482124 | 76.57323  | 0.0   | 0.998  | -150.229     | 149.9326     |
| Fimbria                     | -70.53908  | 90.41317  | -0.78 | 0.435  | -247.7456    | 106.6675     |
| GC-DG                       | 181.4862   | 59.44923  | 3.05  | 0.002  | 64.96785     | 298.0046     |
| Hipp. tail                  | 142.3676   | 139.7302  | 1.02  | 0.308  | -131.4986    | 416.2337     |
| DR                          | -1.908422  | 5.330646  | -0.36 | 0.72   | -12.3563     | 8.539453     |
| DR <sup>2</sup>             | 0.266382   | 1.075259  | 0.25  | 0.804  | -1.841087    | 2.373851     |
| DR <sup>3</sup>             | -0.0048573 | 0.0641651 | -0.08 | 0.94   | -0.1306187   | 0.120904     |
| Subregion x DR              |            |           |       |        |              |              |
| Presubic.                   | 0.3440867  | 6.34215   | 0.05  | 0.957  | -12.0863     | 12.77447     |
| Subiculum                   | 5.794226   | 6.278522  | 0.92  | 0.356  | -6.511452    | 18.0999      |
| CA1                         | 24.61621   | 8.74815   | 2.81  | 0.005  | 7.470148     | 41.76227     |
| CA3                         | 10.90779   | 4.309464  | 2.53  | 0.011  | 2.461395     | 19.35418     |
| CA4                         | 9.01003    | 3.681234  | 2.45  | 0.014  | 1.794943     | 16.22512     |
| Mol. layer                  | 15.41191   | 6.204158  | 2.48  | 0.013  | 3.251989     | 27.57184     |
| HATA                        | 5.376558   | 4.910737  | 1.09  | 0.274  | -4.248309    | 15.00143     |
| Fimbria                     | 6.005151   | 5.79831   | 1.04  | 0.3    | -5.359327    | 17.36963     |
| GC-DG                       | 10.64524   | 3.812554  | 2.79  | 0.005  | 3.172767     | 18.1177      |
| Hipp. tail                  | -1.760542  | 8.961072  | -0.2  | 0.844  | -19.32392    | 15.80284     |
| Subregion x DR <sup>2</sup> |            |           |       |        |              |              |
| Presubic.                   | -0.4619335 | 1.28024   | -0.36 | 0.718  | -2.971158    | 2.047291     |
| Subiculum                   | -1.246305  | 1.267396  | -0.98 | 0.325  | -3.730355    | 1.237746     |
| CA1                         | -5.208047  | 1.76592   | -2.95 | 0.003  | -8.669187    | -1.746907    |
| CA3                         | -1.716611  | 0.8699175 | -1.97 | 0.048  | -3.421618    | -0.0116037   |

| Term                        | Estimate   | Std. Err. | z     | p     | 95% CI Lower | 95% CI Upper |
|-----------------------------|------------|-----------|-------|-------|--------------|--------------|
| CA4                         | -1.622864  | 0.7431018 | -2.18 | 0.029 | -3.079317    | -0.1664114   |
| Mol. layer                  | -3.292506  | 1.252385  | -2.63 | 0.009 | -5.747135    | -0.8378774   |
| HATA                        | -0.8662525 | 0.9912918 | -0.87 | 0.382 | -2.809149    | 1.076644     |
| Fimbria                     | -1.086774  | 1.170459  | -0.93 | 0.353 | -3.380832    | 1.207284     |
| GC-DG                       | -2.026433  | 0.7696102 | -2.63 | 0.008 | -3.534842    | -0.5180251   |
| Hipp. tail                  | 0.6305962  | 1.808901  | 0.35  | 0.727 | -2.914785    | 4.175977     |
| Subregion x DR <sup>3</sup> |            |           |       |       |              |              |
| Presubic.                   | 0.0387764  | 0.0764449 | 0.51  | 0.612 | -0.1110528   | 0.1886057    |
| Subiculum                   | 0.0638613  | 0.075678  | 0.84  | 0.399 | -0.0844648   | 0.2121874    |
| CA1                         | 0.2831935  | 0.1054455 | 2.69  | 0.007 | 0.0765241    | 0.489863     |
| CA3                         | 0.0753015  | 0.051944  | 1.45  | 0.147 | -0.0265069   | 0.1771098    |
| CA4                         | 0.082498   | 0.0443716 | 1.86  | 0.063 | -0.0044688   | 0.1694648    |
| Mol. layer                  | 0.1793963  | 0.0747816 | 2.4   | 0.016 | 0.0328271    | 0.3259656    |
| HATA                        | 0.0422152  | 0.0591914 | 0.71  | 0.476 | -0.0737978   | 0.1582282    |
| Fimbria                     | 0.0582368  | 0.0698897 | 0.83  | 0.405 | -0.0787446   | 0.1952182    |
| GC-DG                       | 0.1047487  | 0.0459545 | 2.28  | 0.023 | 0.0146795    | 0.1948178    |
| Hipp. tail                  | -0.0511063 | 0.108012  | -0.47 | 0.636 | -0.2628059   | 0.1605933    |
| Age                         | -0.6375024 | 2.427431  | -0.26 | 0.793 | -5.39518     | 4.120176     |
| Age <sup>2</sup>            | 0.0098815  | 0.0176103 | 0.56  | 0.575 | -0.024634    | 0.044397     |
| Subregion x age             |            |           |       |       |              |              |
| Presubic.                   | 4.422115   | 2.889023  | 1.53  | 0.126 | -1.240266    | 10.0845      |
| Subiculum                   | 9.84731    | 2.860039  | 3.44  | 0.001 | 4.241737     | 15.45288     |
| CA1                         | 6.83658    | 3.985022  | 1.72  | 0.086 | -0.9739185   | 14.64708     |
| CA3                         | 1.270633   | 1.963078  | 0.65  | 0.517 | -2.57693     | 5.118196     |
| CA4                         | 1.851111   | 1.676903  | 1.1   | 0.27  | -1.435559    | 5.13778      |
| Mol. layer                  | 6.276305   | 2.826163  | 2.22  | 0.026 | 0.7371265    | 11.81548     |
| HATA                        | 0.0486649  | 2.236975  | 0.02  | 0.983 | -4.335725    | 4.433055     |
| Fimbria                     | 3.310284   | 2.641289  | 1.25  | 0.21  | -1.866547    | 8.487114     |
| GC-DG                       | 2.527191   | 1.736722  | 1.46  | 0.146 | -0.876722    | 5.931105     |
| Hipp. tail                  | 12.24746   | 4.082013  | 3.0   | 0.003 | 4.246856     | 20.24805     |

| Term                                    | Estimate   | Std. Err. | z     | p      | 95% CI Lower | 95% CI Upper |
|-----------------------------------------|------------|-----------|-------|--------|--------------|--------------|
| Subregion x age <sup>2</sup>            |            |           |       |        |              |              |
| Presubic.                               | -0.0453376 | 0.0209391 | -2.17 | 0.03   | -0.0863774   | -0.0042978   |
| Subiculum                               | -0.087531  | 0.020729  | -4.22 | 0.0001 | -0.1281591   | -0.0469029   |
| CA1                                     | -0.0704198 | 0.0288827 | -2.44 | 0.015  | -0.1270288   | -0.0138109   |
| CA3                                     | -0.0156939 | 0.014228  | -1.1  | 0.27   | -0.0435803   | 0.0121925    |
| CA4                                     | -0.0222503 | 0.0121539 | -1.83 | 0.067  | -0.0460714   | 0.0015708    |
| Mol. layer                              | -0.0697179 | 0.0204835 | -3.4  | 0.001  | -0.1098648   | -0.029571    |
| HATA                                    | -0.0027531 | 0.0162132 | -0.17 | 0.865  | -0.0345303   | 0.0290241    |
| Fimbria                                 | -0.0308448 | 0.0191435 | -1.61 | 0.107  | -0.0683655   | 0.0066758    |
| GC-DG                                   | -0.0308096 | 0.0125874 | -2.45 | 0.014  | -0.0554805   | -0.0061387   |
| Hipp. tail                              | -0.1160412 | 0.0295856 | -3.92 | 0.0001 | -0.174028    | -0.0580544   |
| Total grey matter vol.                  | 0.0003162  | 0.0000243 | 13.02 | 0.0001 | 0.0002686    | 0.0003638    |
| Sex (ref: male)                         | 0.4466621  | 2.272799  | 0.2   | 0.844  | -4.007942    | 4.901266     |
| Education (ref: primary/none)           |            |           |       |        |              |              |
| Secondary                               | -3.642995  | 2.44173   | -1.49 | 0.136  | -8.428698    | 1.142708     |
| Third/higher                            | -4.693827  | 2.493382  | -1.88 | 0.06   | -9.580765    | 0.1931112    |
| Current/past smoker (ref: never smoked) | 1.799415   | 1.807804  | 1.0   | 0.32   | -1.743816    | 5.342645     |
| Handedness (ref: right)                 | -2.308146  | 3.207078  | -0.72 | 0.472  | -8.593904    | 3.977613     |
| Cardiac disease (ref: none)             | -5.880229  | 2.525205  | -2.33 | 0.02   | -10.82954    | -0.9309189   |
| Intercept                               | -121.5923  | 84.43171  | -1.44 | 0.15   | -287.0755    | 43.89077     |
| Random effects parameters               |            |           |       |        |              |              |
| Participant var                         | 220.0317   | 24.23295  | N/A   | N/A    | 177.3124     | 273.0432     |
| Hemisphere var                          | 234.5004   | 16.21626  | N/A   | N/A    | 204.7769     | 268.5382     |
| Residuals var                           |            |           |       |        |              |              |
| Presubic.                               | 1230.247   | 59.38431  | N/A   | N/A    | 1119.192     | 1352.322     |
| Subiculum                               | 1193.238   | 57.76756  | N/A   | N/A    | 1085.221     | 1312.006     |
| Parasubic.                              | 623.5396   | 29.95679  | N/A   | N/A    | 567.549      | 685.107      |
| CA1                                     | 2903.572   | 139.5029  | N/A   | N/A    | 2642.63      | 3190.28      |



| Term       | Estimate | Std. Err. | z   | p   | 95% CI Lower | 95% CI Upper |
|------------|----------|-----------|-----|-----|--------------|--------------|
| CA3        | 232.3805 | 11.24457  | N/A | N/A | 211.3543     | 255.4983     |
| CA4        | 1.019755 | 1.512874  | N/A | N/A | 0.0556778    | 18.6771      |
| Mol. layer | 1150.456 | 55.55286  | N/A | N/A | 1046.568     | 1264.656     |
| HATA       | 487.8853 | 23.5053   | N/A | N/A | 443.9239     | 536.2        |
| Fimbria    | 925.9533 | 44.73891  | N/A | N/A | 842.2906     | 1017.926     |
| GC-DG      | 46.37387 | 2.366836  | N/A | N/A | 41.95944     | 51.25274     |
| Hipp. tail | 3077.355 | 147.4349  | N/A | N/A | 2801.54      | 3380.324     |

Supplementary table 3: Animal naming (AN) fully adjusted model output

| Term                        | Estimate   | Std. Err. | z     | p       | 95% CI Lower | 95% CI Upper |
|-----------------------------|------------|-----------|-------|---------|--------------|--------------|
| Subregion (ref: Parasubic.) |            |           |       |         |              |              |
| Presubic.                   | 123.0444   | 74.69081  | 1.65  | 0.099   | -23.34692    | 269.4357     |
| Subiculum                   | 67.48078   | 90.11154  | 0.75  | 0.454   | -109.1346    | 244.0961     |
| CA1                         | 368.1414   | 149.7879  | 2.46  | 0.014   | 74.56251     | 661.7202     |
| CA3                         | 123.2055   | 64.811    | 1.9   | 0.057   | -3.821685    | 250.2328     |
| CA4                         | 148.8614   | 49.60835  | 3.0   | 0.003   | 51.63083     | 246.092      |
| Mol. layer                  | 348.0783   | 107.8584  | 3.23  | 0.001   | 136.6797     | 559.4768     |
| HATA                        | 0.3772842  | 31.83129  | 0.01  | 0.991   | -62.0109     | 62.76547     |
| Fimbria                     | -71.04233  | 48.67718  | -1.46 | 0.144   | -166.4478    | 24.36318     |
| GC-DG                       | 178.6825   | 57.66097  | 3.1   | 0.002   | 65.66912     | 291.696      |
| Hipp. tail                  | 134.2273   | 140.9655  | 0.95  | 0.341   | -142.0599    | 410.5145     |
| AN                          | 0.0415445  | 0.1094801 | 0.38  | 0.704   | -0.1730325   | 0.2561216    |
| Subregion x AN              |            |           |       |         |              |              |
| Presubic.                   | 0.561801   | 0.2209305 | 2.54  | 0.011   | 0.1287852    | 0.9948168    |
| Subiculum                   | 0.0066676  | 0.266544  | 0.03  | 0.98    | -0.515749    | 0.5290842    |
| CA1                         | 0.1477009  | 0.4430627 | 0.33  | 0.739   | -0.720686    | 1.016088     |
| CA3                         | 0.0893117  | 0.1917067 | 0.47  | 0.641   | -0.2864265   | 0.4650498    |
| CA4                         | 0.1934462  | 0.1467382 | 1.32  | 0.187   | -0.0941555   | 0.4810478    |
| Mol. layer                  | 0.2698257  | 0.319038  | 0.85  | 0.398   | -0.3554773   | 0.8951286    |
| HATA                        | 0.0330235  | 0.0941549 | 0.35  | 0.726   | -0.1515166   | 0.2175636    |
| Fimbria                     | 0.1164187  | 0.1439839 | 0.81  | 0.419   | -0.1657845   | 0.3986219    |
| GC-DG                       | 0.209401   | 0.1705573 | 1.23  | 0.22    | -0.1248852   | 0.5436873    |
| Hipp. tail                  | 0.5564656  | 0.4169665 | 1.33  | 0.182   | -0.2607738   | 1.373705     |
| Age                         | -0.2796054 | 1.053981  | -0.27 | 0.791   | -2.345371    | 1.78616      |
| Age <sup>2</sup>            | 0.0044625  | 0.0076371 | 0.58  | 0.559   | -0.010506    | 0.019431     |
| Subregion x age             |            |           |       |         |              |              |
| Presubic.                   | 4.487421   | 2.168075  | 2.07  | 0.038   | 0.2380714    | 8.736771     |
| Subiculum                   | 10.42076   | 2.615698  | 3.98  | 0.00001 | 5.294082     | 15.54743     |

| Term                                    | Estimate   | Std. Err. | z     | p       | 95% CI Lower | 95% CI Upper |
|-----------------------------------------|------------|-----------|-------|---------|--------------|--------------|
| CA1                                     | 7.997668   | 4.347943  | 1.84  | 0.066   | -0.5241442   | 16.51948     |
| CA3                                     | 1.391027   | 1.881291  | 0.74  | 0.46    | -2.296235    | 5.078289     |
| CA4                                     | 2.020735   | 1.439998  | 1.4   | 0.161   | -0.80161     | 4.843079     |
| Mol. layer                              | 6.915266   | 3.130842  | 2.21  | 0.027   | 0.7789295    | 13.0516      |
| HATA                                    | 0.2981528  | 0.9239776 | 0.32  | 0.747   | -1.51281     | 2.109116     |
| Fimbria                                 | 3.514242   | 1.412969  | 2.49  | 0.013   | 0.7448739    | 6.28361      |
| GC-DG                                   | 2.802074   | 1.673744  | 1.67  | 0.094   | -0.478405    | 6.082552     |
| Hipp. tail                              | 12.1354    | 4.091852  | 2.97  | 0.003   | 4.115516     | 20.15528     |
| Subregion x age <sup>2</sup>            |            |           |       |         |              |              |
| Presubic.                               | -0.0453182 | 0.0156899 | -2.89 | 0.004   | -0.0760698   | -0.0145666   |
| Subiculum                               | -0.0915362 | 0.0189292 | -4.84 | 0.00001 | -0.1286369   | -0.0544356   |
| CA1                                     | -0.0775817 | 0.0314651 | -2.47 | 0.014   | -0.1392522   | -0.0159112   |
| CA3                                     | -0.0165555 | 0.0136145 | -1.22 | 0.224   | -0.0432394   | 0.0101284    |
| CA4                                     | -0.0235354 | 0.010421  | -2.26 | 0.024   | -0.0439601   | -0.0031108   |
| Mol. layer                              | -0.0736655 | 0.0226572 | -3.25 | 0.001   | -0.1180728   | -0.0292581   |
| HATA                                    | -0.0046306 | 0.0066866 | -0.69 | 0.489   | -0.0177362   | 0.0084749    |
| Fimbria                                 | -0.0322839 | 0.0102253 | -3.16 | 0.002   | -0.0523252   | -0.0122425   |
| GC-DG                                   | -0.0326399 | 0.0121125 | -2.69 | 0.007   | -0.05638     | -0.0088998   |
| Hipp. tail                              | -0.1152019 | 0.0296118 | -3.89 | 0.00001 | -0.1732401   | -0.0571638   |
| Total grey matter vol.                  | 0.0001579  | 0.0000115 | 13.68 | 0.00001 | 0.0001353    | 0.0001805    |
| Sex (ref: male)                         | -0.6457086 | 1.060777  | -0.61 | 0.543   | -2.724794    | 1.433376     |
| Education (ref: primary/none)           |            |           |       |         |              |              |
| Secondary                               | -2.739217  | 1.164294  | -2.35 | 0.019   | -5.021191    | -0.457243    |
| Third/higher                            | -2.635385  | 1.194126  | -2.21 | 0.027   | -4.975829    | -0.2949403   |
| Current/past smoker (ref: never smoked) | 0.0070375  | 0.8549602 | 0.01  | 0.993   | -1.668654    | 1.682729     |
| Handedness (ref: right)                 | -1.799715  | 1.532505  | -1.17 | 0.24    | -4.803369    | 1.203939     |
| Cardiac disease (ref: none)             | -2.822095  | 1.188532  | -2.37 | 0.018   | -5.151574    | -0.4926151   |
| Intercept                               | -30.11325  | 36.9652   | -0.81 | 0.415   | -102.5637    | 42.33721     |

| Term                      | Estimate | Std. Err. | z   | p   | 95% CI Lower | 95% CI Upper |
|---------------------------|----------|-----------|-----|-----|--------------|--------------|
| Random effects parameters |          |           |     |     |              |              |
| Participant var           | 55.96477 | 5.91719   | N/A | N/A | 45.49007     | 68.8514      |
| Hemisphere var            | 10.69511 | 2.748748  | N/A | N/A | 6.462761     | 17.69915     |
| Residuals var             |          |           |     |     |              |              |
| Presubic.                 | 931.7526 | 46.36625  | N/A | N/A | 845.1675     | 1027.208     |
| Subiculum                 | 1412.923 | 70.57024  | N/A | N/A | 1281.162     | 1558.234     |
| Parasubic.                | 124.4929 | 7.71931   | N/A | N/A | 110.2465     | 140.5802     |
| CA1                       | 4123.501 | 201.3206  | N/A | N/A | 3747.21      | 4537.578     |
| CA3                       | 670.8015 | 34.16381  | N/A | N/A | 607.0752     | 741.2174     |
| CA4                       | 341.4578 | 19.11082  | N/A | N/A | 305.9826     | 381.046      |
| Mol. layer                | 2078.121 | 103.7431  | N/A | N/A | 1884.419     | 2291.733     |
| HATA                      | 67.34705 | 5.563455  | N/A | N/A | 57.27985     | 79.18361     |
| Fimbria                   | 324.1298 | 16.93821  | N/A | N/A | 292.5751     | 359.0878     |
| GC-DG                     | 505.0051 | 27.36972  | N/A | N/A | 454.1123     | 561.6015     |
| Hipp. tail                | 3637.828 | 176.764   | N/A | N/A | 3307.363     | 4001.313     |

Supplementary table 4: test-retest reliability data for immediate recall (IR), delayed recall (DR) and animal naming (AN) tasks in TILDA MRI cohort, across Waves 1-3.

|        | IR1 W1 | IR2 W1 | DR W1 | IR1 W2 | IR2 W2 | DR W2 | IR1 W3 | IR2 W3 | DR W3 | AN W1 | AN W2 | AN W3 |
|--------|--------|--------|-------|--------|--------|-------|--------|--------|-------|-------|-------|-------|
| IR1 W1 | 1      |        |       |        |        |       |        |        |       |       |       |       |
| IR2 W1 | 0.62   | 1      |       |        |        |       |        |        |       |       |       |       |
| DR W1  | 0.54   | 0.65   | 1     |        |        |       |        |        |       |       |       |       |
| IR1 W2 | 0.44   | 0.43   | 0.42  | 1      |        |       |        |        |       |       |       |       |
| IR2 W2 | 0.38   | 0.47   | 0.48  | 0.68   | 1      |       |        |        |       |       |       |       |
| DR W2  | 0.38   | 0.46   | 0.53  | 0.65   | 0.70   | 1     |        |        |       |       |       |       |
| IR1 W3 | 0.35   | 0.37   | 0.38  | 0.44   | 0.41   | 0.37  | 1      |        |       |       |       |       |
| IR2 W3 | 0.35   | 0.39   | 0.41  | 0.43   | 0.44   | 0.43  | 0.67   | 1      |       |       |       |       |
| DR W3  | 0.37   | 0.41   | 0.51  | 0.43   | 0.43   | 0.53  | 0.59   | 0.72   | 1     |       |       |       |
| AN W1  | 0.27   | 0.32   | 0.32  | 0.20   | 0.24   | 0.24  | 0.17   | 0.21   | 0.20  | 1     |       |       |
| AN W2  | 0.22   | 0.28   | 0.31  | 0.35   | 0.39   | 0.44  | 0.24   | 0.24   | 0.24  | 0.49  | 1     |       |
| AN W3  | 0.20   | 0.20   | 0.23  | 0.25   | 0.25   | 0.27  | 0.26   | 0.34   | 0.28  | 0.44  | 0.50  | 1     |

N=513. IR1: immediate recall attempt 1; IR2: immediate recall attempt 2; DR: delayed recall; AN: animal naming; W1: Wave 1; W2: Wave 2; W3: Wave 3.

**N=560**

• **T<sub>1w</sub> scan collected**

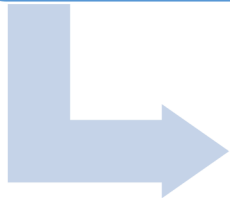

**Exclusions**

- Data quality control exclusions (n=51):
  - Motion artifact (n=33);
  - GM/WM lesion (n=18);
- Physical & cognitive health exclusions (n=73):
  - History of PD and/or stroke and/or TIA (n=15);
  - MMSE < 24 (n=4);
  - MoCA < age & edu norms (n=41);
  - Immediate recall  $\pm 3SDs$  (n=3);
  - BMI > 49 (n=3)
  - Timed up-and-go/chair stands  $\pm 3SDs$  (n=7)

**N=509**

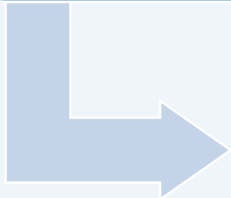

**N=436**

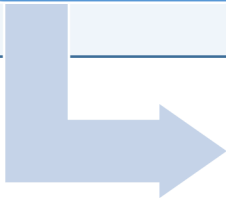

**Analysis  
N=436**

• Hippocampal subfield volume analyses

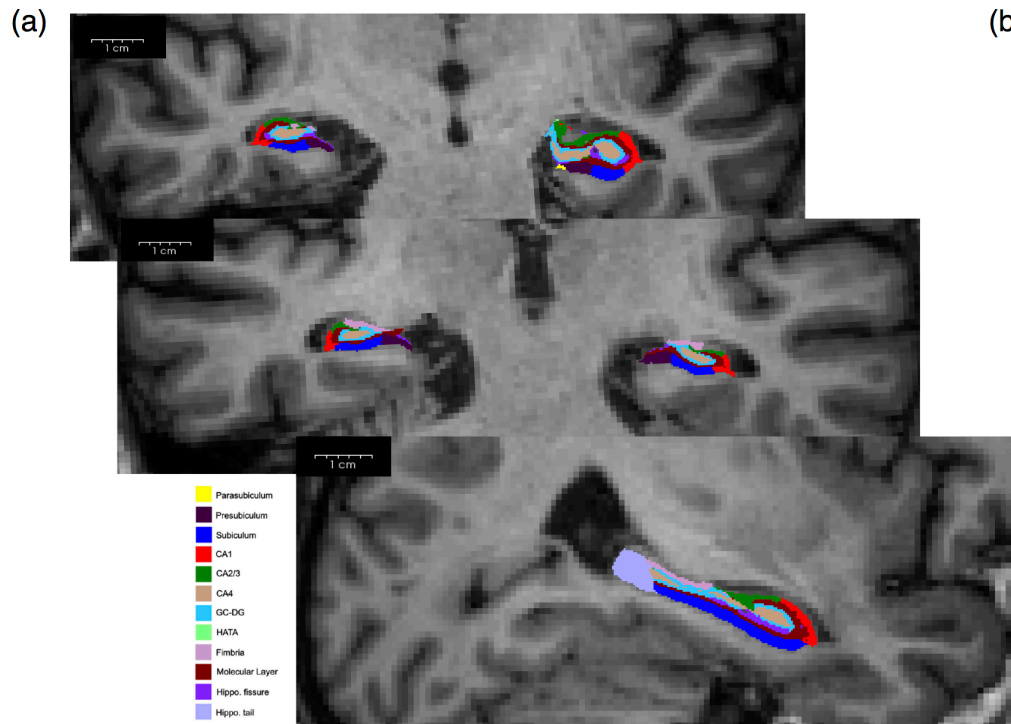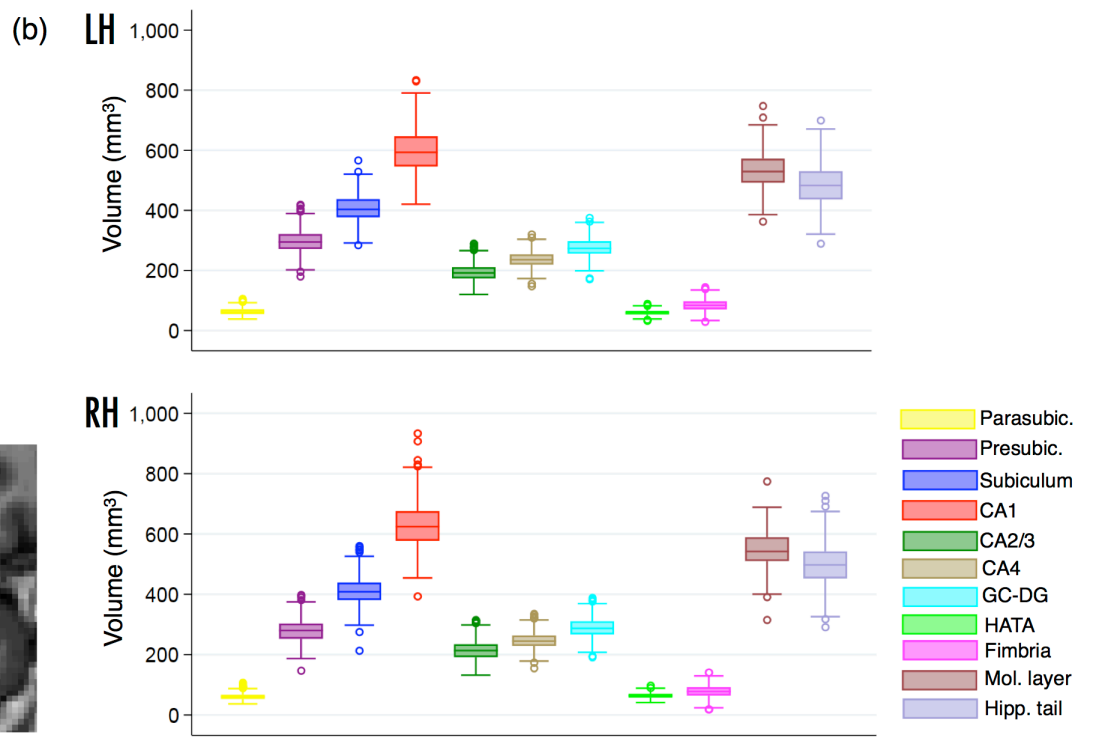

Supplementary Figure S1: Exclusionary criteria leading to analysis sample for hippocampal subfield volumes, N=436. PD - Parkinson's disease; TIA - transient ischemic attack; MMSE - Mini-mental State Examination; MoCA - Montreal Cognitive Assessment. Timed up-and-go: time (s) taken to rise from chair, walk 3m, walk back to chair, and return to seated position. Chair stands: time taken to repeat five stands from seated position, without assistance of arms. MoCA age and education norms based on [9].

Supplementary Figure S2: Hippocampal subfield parcellation summary. (a) Two coronal views and one sagittal view of hippocampal subfield parcellations, for a representative TILDA participant; subfields colour coded (see legend, left inset). (b) Box plots of hippocampal subfield volumes ( $\text{mm}^3$ ) for left and right hemispheres for the analysis sample, N=436; subfields colour coded (see legend, right inset).
